# Supplementary material for: One-step preparation of bioactive enzyme/inorganic materials
Source: Royal Society of Chemistry journal article supplement (doi:10.1039/d1tb01652k), 2021-01-01
Supplement: d1tb01652k1.pdf [file d1tb01652k1.pdf]

Electronic Supplemental Information File

## One-step preparation of bioactive enzyme/inorganic materials

Mansi Malhotra<sup>a</sup>, Megan K. Puglia<sup>a</sup>, Clive L. Baveghems<sup>a†</sup>, Ajith Pattammattel,<sup>a‡</sup> Monica E. Koubeck<sup>a</sup>, Katharine Bruder<sup>a</sup>, Challa V. Kumar<sup>a,b,c\*</sup>

a. University of Connecticut, Department of Chemistry, U3060, Storrs, CT, USA, 06269

b. University of Connecticut, Department of Molecular and Cell Biology, Storrs, CT, USA, 06269

c. University of Connecticut, Institute of Materials Science, Storrs, CT USA, 06269

|                                                                                                                                                      |           |
|------------------------------------------------------------------------------------------------------------------------------------------------------|-----------|
| <b>Experimental</b> .....                                                                                                                            | <b>1</b>  |
| <b>CD Spectroscopy</b> .....                                                                                                                         | <b>1</b>  |
| <b>Results and Discussion:</b> .....                                                                                                                 | <b>2</b>  |
| <b>Standard curve to determine the concentration of exfoliated <math>\alpha</math>-ZrP (mg/mL) from the absorbance value at 350 nm</b> .....         | <b>2</b>  |
| <b>X-ray Powder Diffraction of exfoliated <math>\alpha</math>-ZrP (mg/mL) at different exfoliation time (min)</b> .....                              | <b>3</b>  |
| <b>XRPD of exfoliated <math>\alpha</math>-ZrP at different pH</b> .....                                                                              | <b>4</b>  |
| <b>Microscopy of exfoliated <math>\alpha</math>-ZrP</b> .....                                                                                        | <b>5</b>  |
| SEM .....                                                                                                                                            | <b>5</b>  |
| <b>Correlation plot between initial concentration of BSA and BSA bound after the exfoliation process</b> .....                                       | <b>6</b>  |
| <b>Exfoliation of ZrP with BSA-FITC via stirring method</b> .....                                                                                    | <b>7</b>  |
| <b>Enzymology- Binding and Kinetics with stirring method</b> .....                                                                                   | <b>8</b>  |
| <b>Order of rate results</b> .....                                                                                                                   | <b>14</b> |
| <b>Correlation of different physical and chemical properties of proteins with percent peak intensity of exfoliated <math>\alpha</math>-ZrP</b> ..... | <b>15</b> |

### Experimental

#### CD Spectroscopy

A Jasco J-710 CD spectrophotometer (Easton, MD) with 0.02 cm path length quartz cuvettes, in the wavelength range of 260–200 nm was used. Bandwidth and the sensitivity were set to 1 nm and 50 millidegrees, respectively. Three scans were accumulated for each sample and the average spectrum was recorded. The samples were used directly after stirring and were diluted to micromolar concentrations. All spectra were normalized per micro molar bound enzyme per 1 cm path length and has been compared to the spectra of the corresponding unbound enzyme, measured under the same conditions.

## Results and Discussion:

Standard curve to determine the concentration of exfoliated  $\alpha$ -ZrP (mg/mL) from the absorbance value at 350 nm

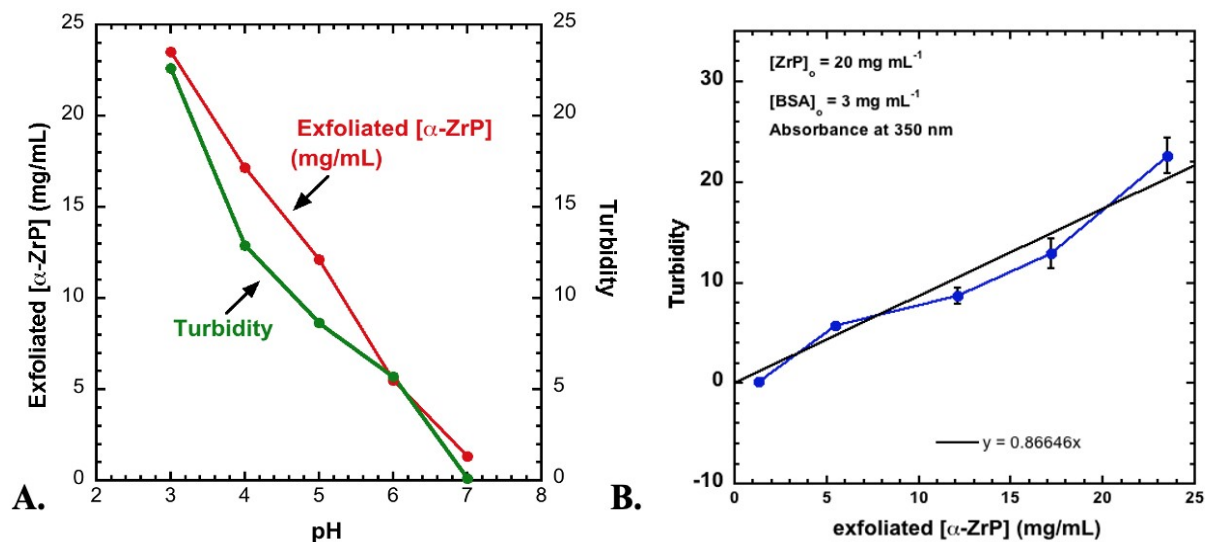

**Figure S1:** **A.** Concentration of exfoliated  $\alpha$ -ZrP and turbidity (calculated as the product of absorbance of the suspension at 350 nm and the dilution factor used) as a function of pH. **B.** Standard curve plotted by correlating turbidity and concentration of exfoliated  $\alpha$ -ZrP (mg/mL) at different pH to calculate the concentration of exfoliated  $\alpha$ -ZrP as a function of turbidity (or absorbance at 350 nm). The calculated extinction coefficient at 350 nm was  $0.86646 \text{ L mol}^{-1} \text{ cm}^{-1}$ .

X-ray Powder Diffraction of exfoliated  $\alpha$ -ZrP (mg/mL) at different exfoliation time (min)

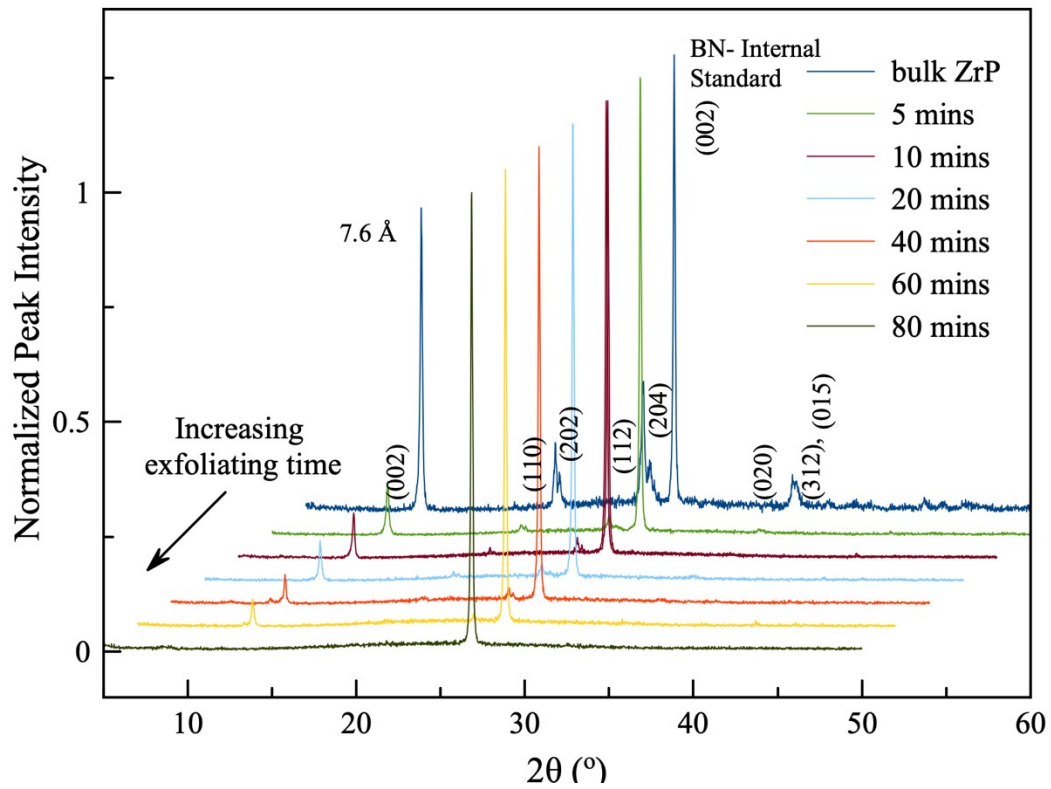

Figure S2: XRD diffractograms of exfoliated  $\alpha$ -ZrP at different exfoliation time.

XRPD of exfoliated  $\alpha$ -ZrP at different pH

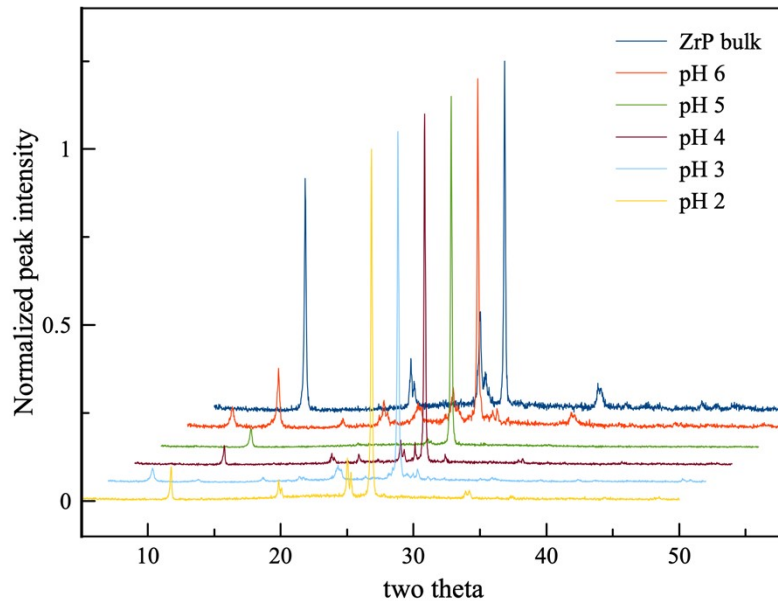

**Figure S3:** XRD patterns of exfoliated  $\alpha$ -ZrP at different pH.

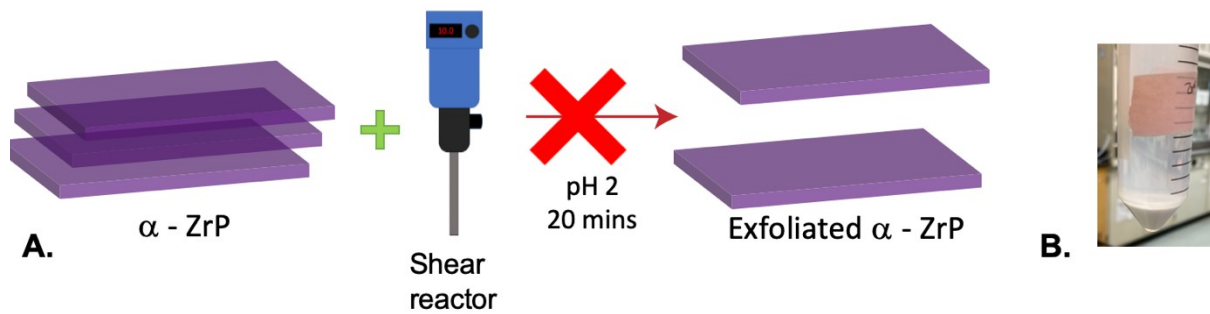

**Figure S4:** Exfoliation of  $\alpha$ -ZrP at pH 2 without BSA. **A.** Schematic showing the procedure for exfoliating  $\alpha$ -ZrP at pH 2 (10,000 rpm, 20 minutes shear time). **B.** the resultant dispersion displaying unsuccessful exfoliation (all sample precipitated at the bottom).

## Microscopy of exfoliated $\alpha$ -ZrP:

SEM

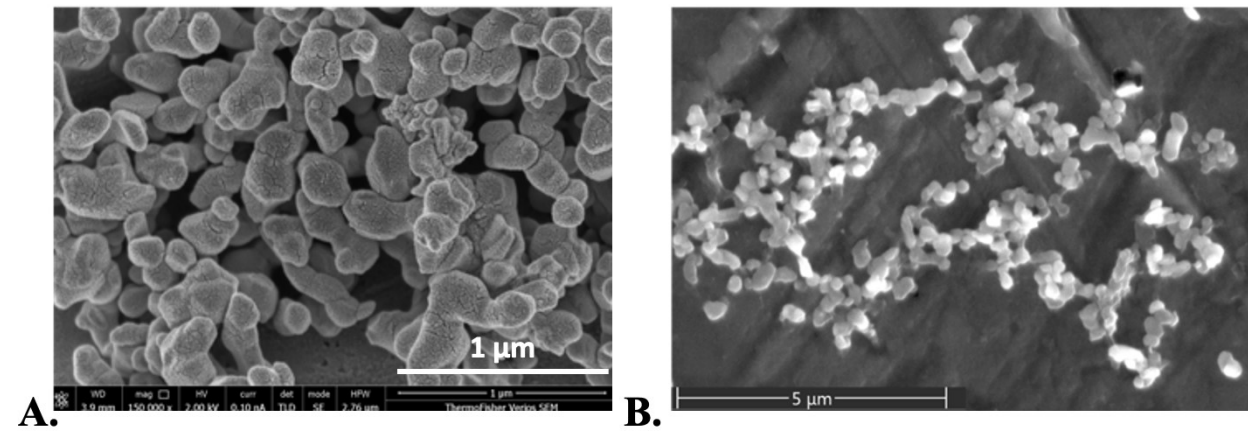

**Figure S5:** Electron microscopic images of bulk and exfoliated  $\alpha$ -ZrP. SEM of **A.** unexfoliated  $\alpha$ -ZrP **B.** exfoliated  $\alpha$ -ZrP (unevenly coated by gold leading to different contrast).

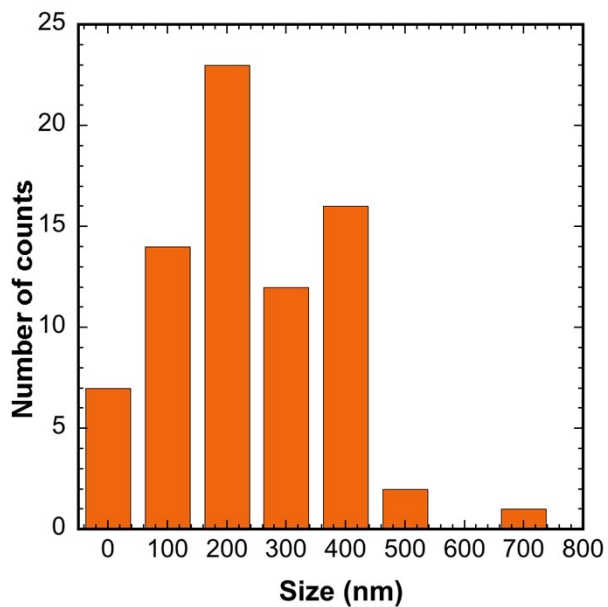

**Figure S6:** TEM Analysis for the exfoliated sample.

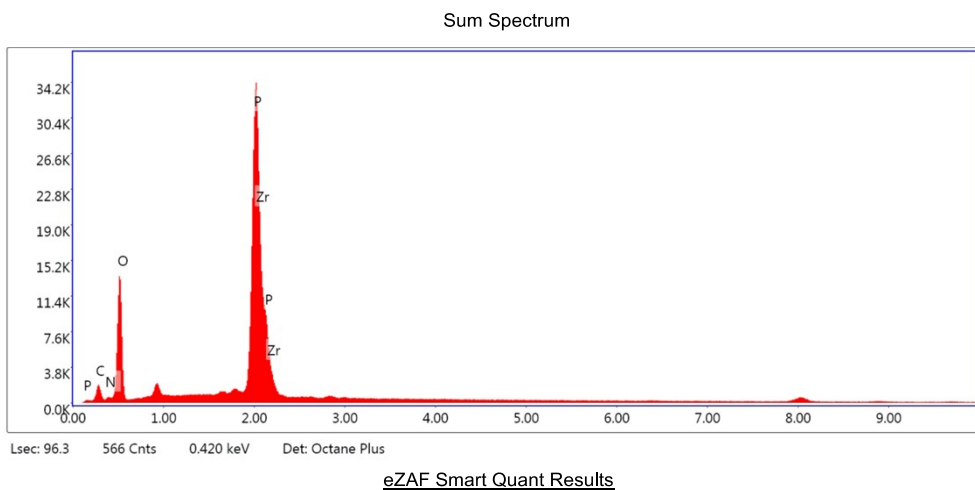

**Figure S7:** EDS sum spectrum of BSA exfoliated  $\alpha$ -ZrP showing the peaks of elements detected as collected from SEM.

Correlation plot between initial concentration of BSA and BSA bound after the exfoliation process.

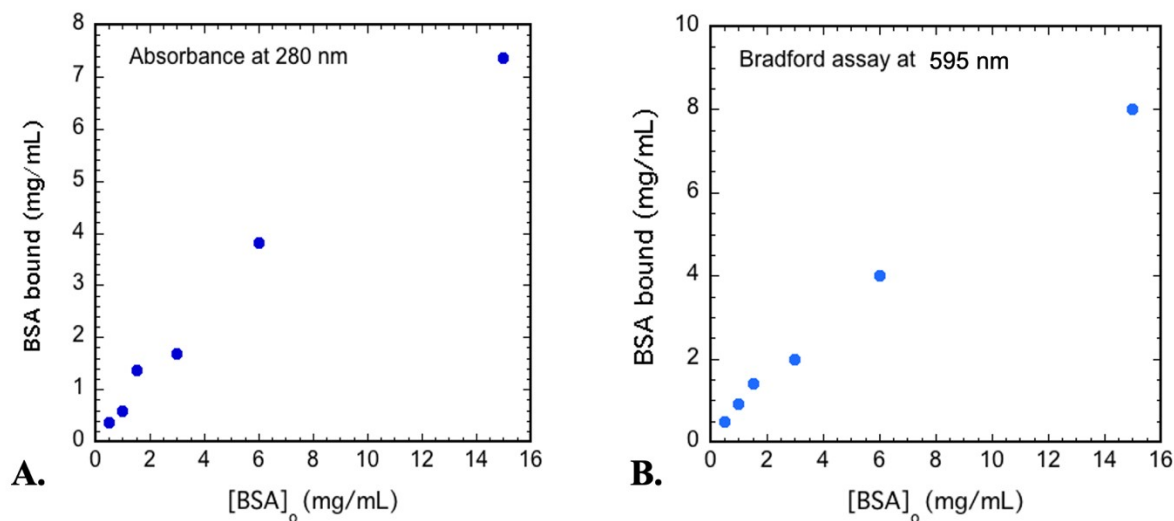

**Figure S8:** Correlation plot between the amount of BSA (mg/mL) added for exfoliation and BSA bound (mg/mL) to  $\alpha$ -ZrP as calculated from **A.** absorbance measured 280 nm and **B.** Bradford assay absorbance at 595 nm.

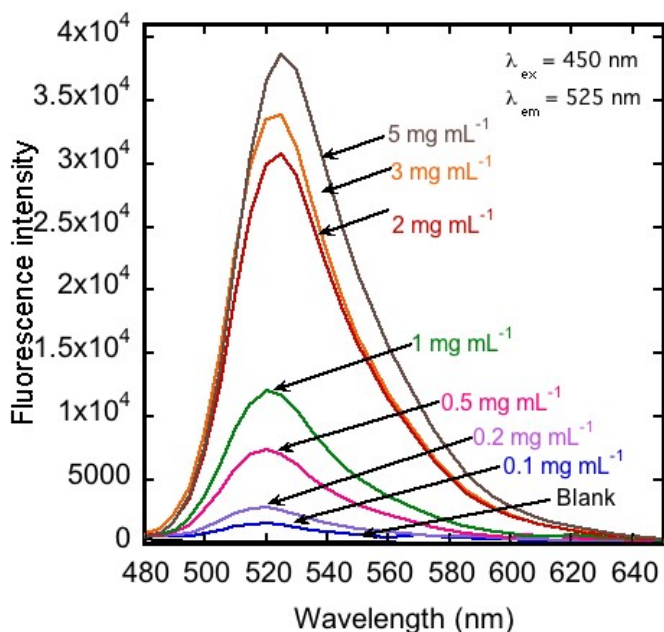

**Figure S9:** Standard curve to calculate the concentration of BSA from BSA-FITC fluorescence. The black curve represents the sodium phosphate buffer (20 mM, pH 7) used in studies

#### Exfoliation of ZrP with BSA-FITC via stirring method

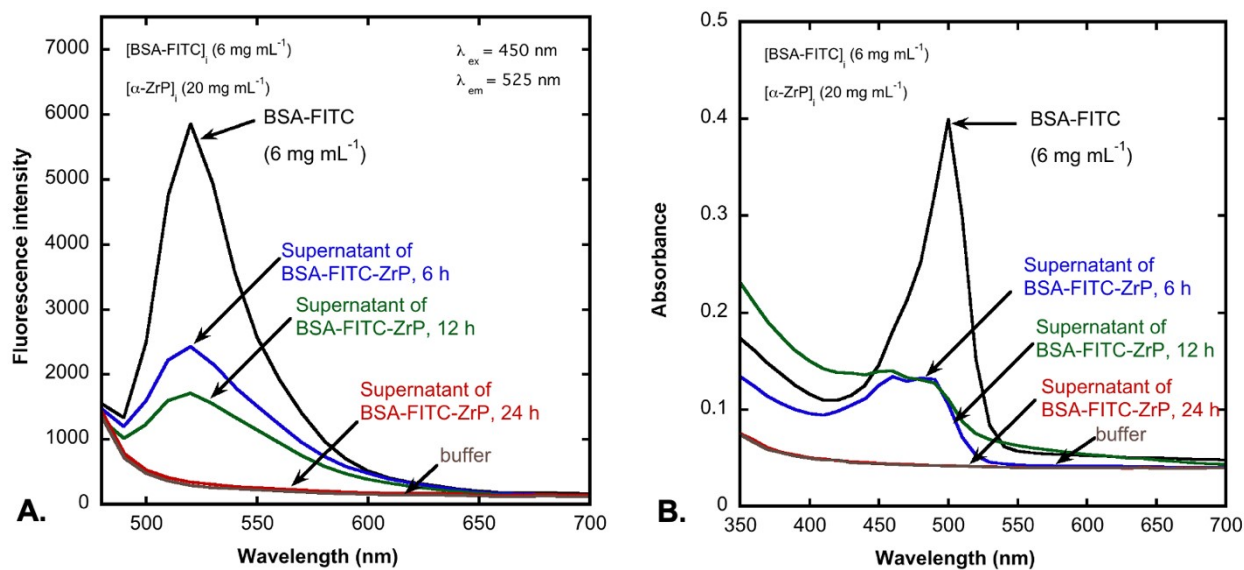

**Figure S10** Time dependence of BSA-FITC depletion during exfoliation (A. Fluorescence and B. absorbance of the supernatant of BSA-FITC-ZrP samples at different times of stirring- Blue curve- 6 h, green curve- 12 h, red curve- 24 h)

Enzymology- Binding and Kinetics with stirring method

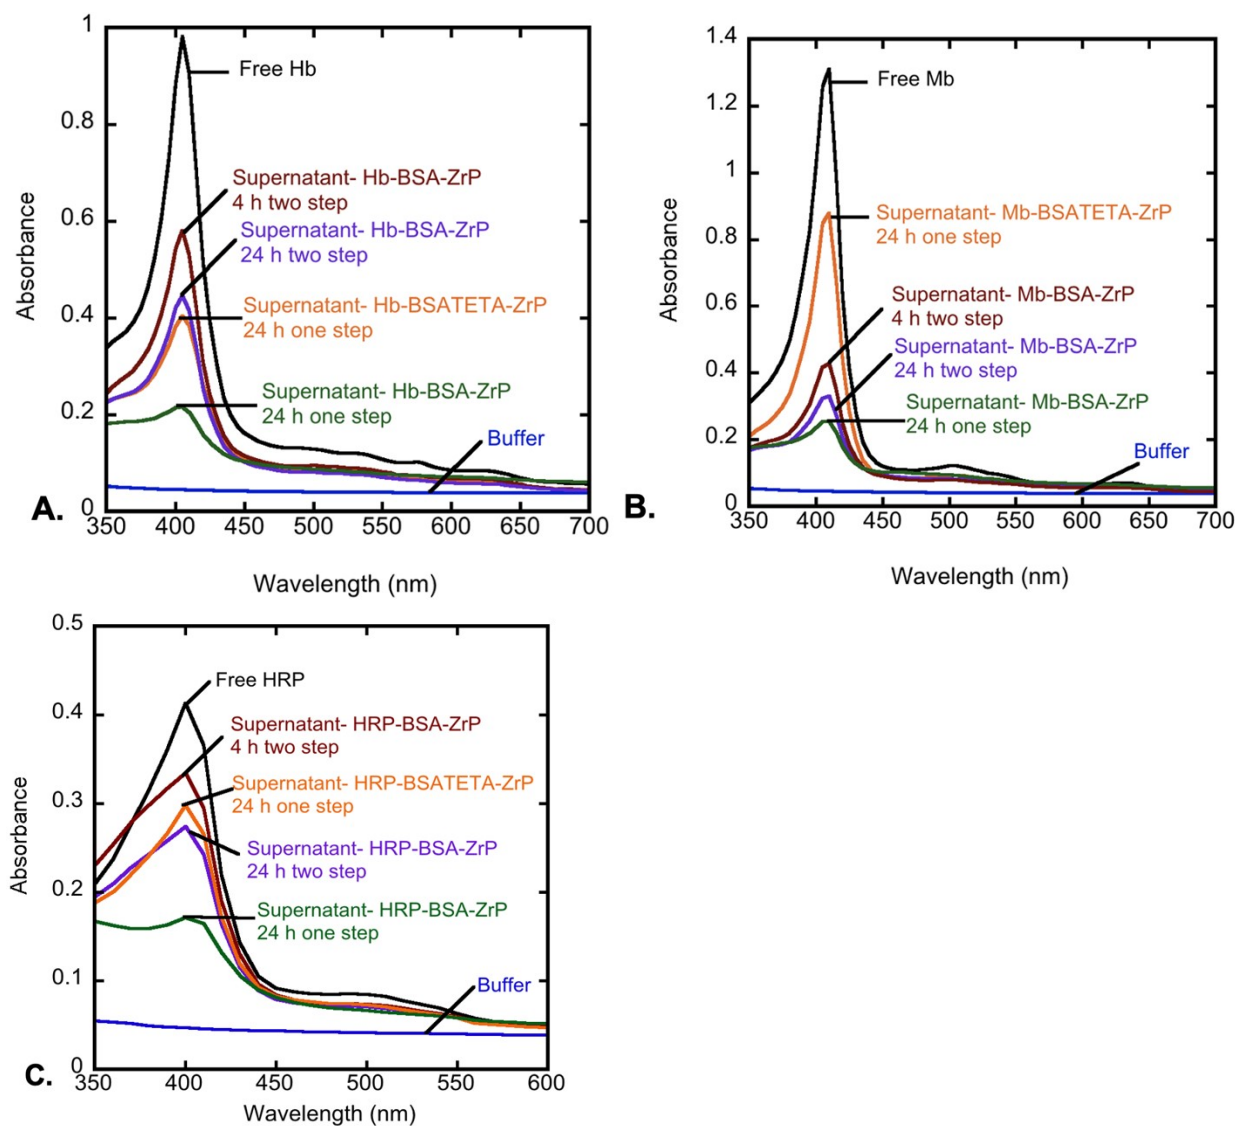

**Figure S11: Binding of enzymes in enzyme-BSA-ZrP samples (10 mM sodium phosphate buffer at pH 7) Absorbance spectra for supernatant of A. Hb-BSA-ZrP samples (depletion in peaks of Hb with respect to process followed) B. Mb-BSA-ZrP samples (depletion in peaks of Hb with respect to process followed) C. HRP-BSA-ZrP samples (depletion in peaks of HRP with respect to process followed).**



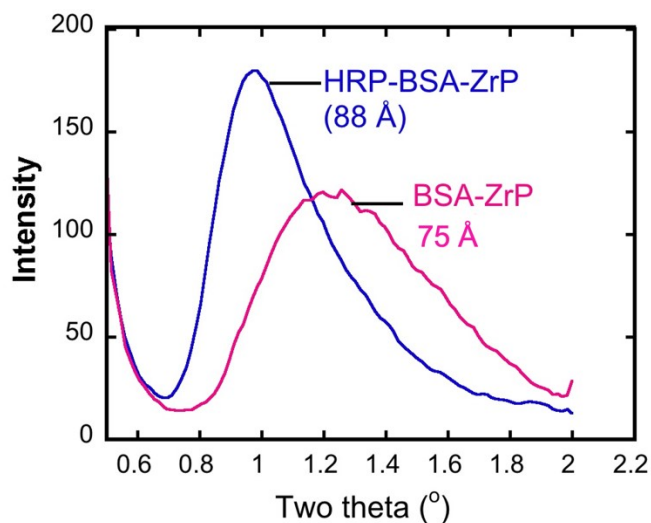

**Figure S12: Small angle XRD showing proteins in the galleries of ZrP: HRP-BSA-ZrP (blue curve) and BSA-ZrP (pink curve) the corresponding d-spacing is shown in parentheses.**

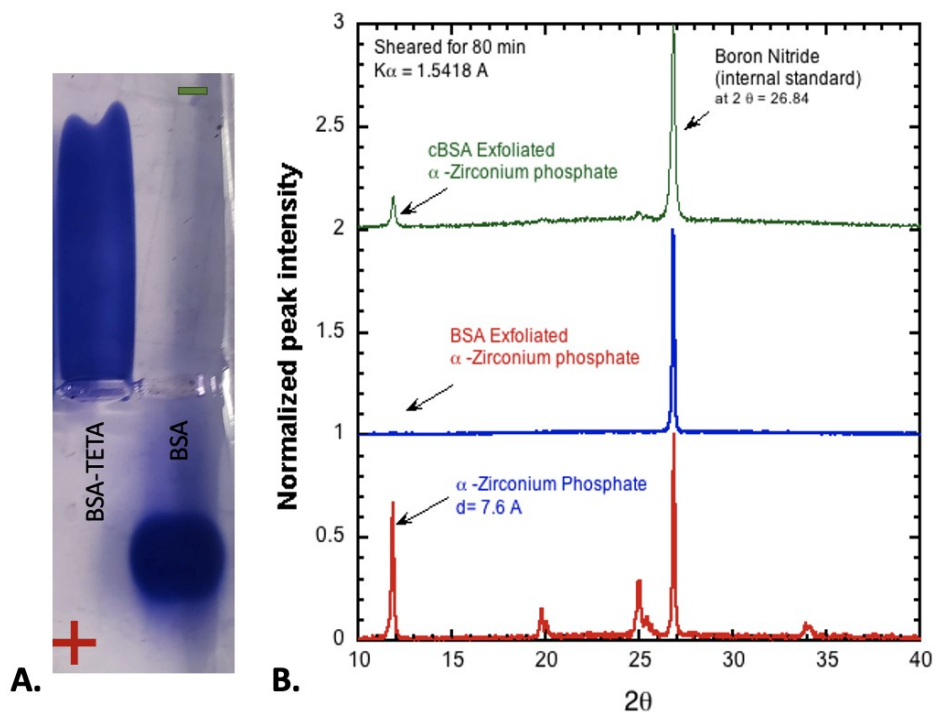

**Figure S13: A.** agarose gel showing cationized BSA (BSA modified with TETA, charge +35). **B.** X-Ray Diffraction patterns of unexfoliated  $\alpha$ -zirconium phosphate showing characteristic peak at d spacing = 7.6 Å and BSA and cBSA exfoliated  $\alpha$ -Zirconium phosphate sheared at 80 minutes with no peak at d spacing = 7.6 Å ( $2\theta = 11.84^\circ$ ). All XRD patterns were recorded with boron nitride as an internal standard and the characteristic BN peak at  $2\theta = 26.84^\circ$  was used for

normalizing peak intensities. The exfoliation was performed under these conditions  $[\alpha\text{-ZrP}]_0 = 20 \text{ mg mL}^{-1}$ ,  $[\text{BSA}]_0 / [\text{BSA-TETA}]_0 = 3 \text{ mg mL}^{-1}$ , pH 7.

**Table S1:** Amount of bound enzyme and the ratio of specific activity ratio of bound enzyme to the free enzymes

| Sample           | Parameters (Step, stirring time) | Specific activity ratio of bound to free enzyme | Bound enzyme ( $\text{mg mL}^{-1}$ ) |
|------------------|----------------------------------|-------------------------------------------------|--------------------------------------|
| HRP-BSA-ZrP      | Two step, 4 h                    | $0.46 \pm 0.02$                                 | $0.2 \pm 0.03$                       |
| HRP-BSA-ZrP      | Two step, 24 h                   | $0.69 \pm 0.04$                                 | $0.33 \pm 0.01$                      |
| HRP-BSA-ZrP      | One step, 24 h                   | $0.60 \pm 0.01$                                 | $0.86 \pm 0.02$                      |
| HRP-BSA-TETA-ZrP | One step, 24 h                   | $0.30 \pm 0.02$                                 | $0.35 \pm 0.02$                      |
| Mb-BSA-ZrP       | Two step, 4 h                    | $0.51 \pm 0.04$                                 | $0.32 \pm 0.03$                      |
| Mb-BSA-ZrP       | Two step, 24 h                   | $0.60 \pm 0.05$                                 | $0.53 \pm 0.04$                      |
| Mb-BSA-ZrP       | One step, 24 h                   | $0.84 \pm 0.03$                                 | $0.77 \pm 0.06$                      |
| Mb-BSA-TETA-ZrP  | One step, 24 h                   | $0.70 \pm 0.04$                                 | $0.30 \pm 0.04$                      |
| Hb-BSA-ZrP       | Two step, 4 h                    | $0.20 \pm 0.05$                                 | $0.41 \pm 0.03$                      |
| Hb-BSA-ZrP       | Two step, 24 h                   | $0.54 \pm 0.02$                                 | $0.51 \pm 0.04$                      |
| Hb-BSA-ZrP       | One step, 24 h                   | $0.55 \pm .001$                                 | $0.91 \pm 0.02$                      |
| Hb-BSA-TETA-ZrP  | One step, 24 h                   | $0.35 \pm 0.003$                                | $0.610 \pm 0.01$                     |

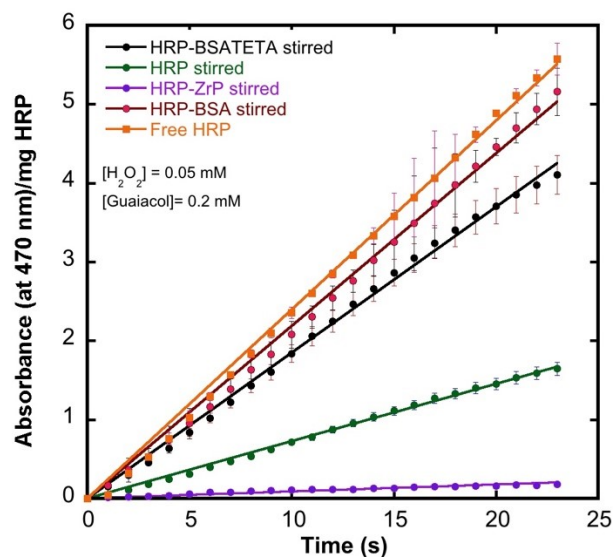

**Figure S14:** Stabilization of enzymes by BSA as observed from kinetics. Initial rate of peroxidase-like activity of free HRP (orange), HRP-BSA (red) stirred for 24 h, HRP-BSATETA (black) stirred for 24 h, HRP (green) stirred for 24 h, and HRP-ZrP stirred at 24 h, room temperature (10 mM sodium phosphate buffer at pH 7) by monitoring sample absorbance at 470 nm.

Table S2: Enzyme kinetics of stirred HRP (control sample). Specific activities and specific activity ratio of bound to free enzyme for HRP.

| Sample                 | Parameters<br>(Step, stirring<br>time) | Specific activity<br>(1 $\mu$ mol of substrate/min mg<br>protein) | Specific activity ratio<br>of bound to free<br>enzyme |
|------------------------|----------------------------------------|-------------------------------------------------------------------|-------------------------------------------------------|
| HRP free               | -                                      | 6.3 $\pm$ 0.08                                                    | 1                                                     |
| HRP stirred            | -, 24 h                                | 1.9 $\pm$ 0.05                                                    | 0.31                                                  |
| HRP BSA<br>stirred     | -, 24 h                                | 5.8 $\pm$ 0.08                                                    | 0.93                                                  |
| HRP-BSATETA<br>stirred | -, 24 h                                | 4.9 $\pm$ 0.06                                                    | 0.79                                                  |
| HRP-ZrP                | One step, 24 h                         | 2.3 $\pm$ 0.07                                                    | 0.36                                                  |

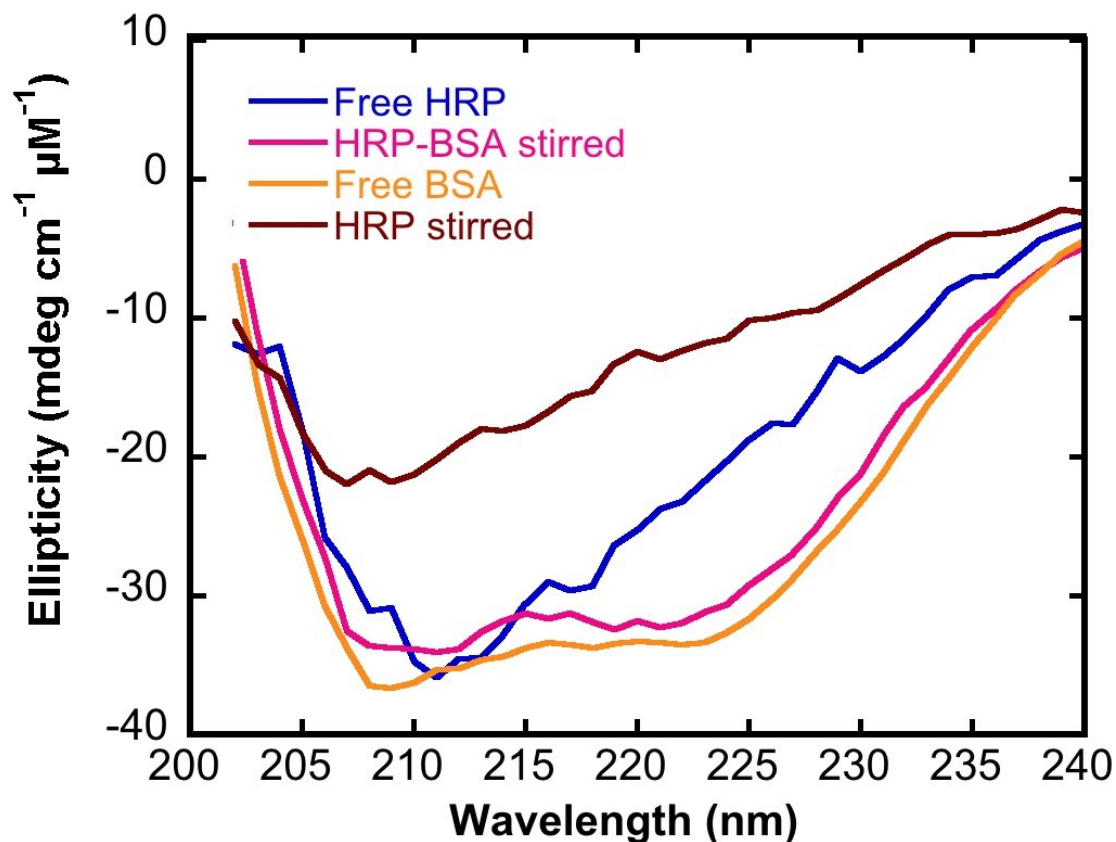

Figure S15: Effect of stirring on the structure of HRP. Far-UV CD spectra of Free HRP (blue, 100  $\mu$ M HRP), HRP stirred for 24 h (dark brown, 10  $\mu$ M HRP), HRP-BSA stirred for 24 h (pink, 36  $\mu$ M, 0.6 mg/mL BSA, 10  $\mu$ M, 0.1 mg/mL HRP- 6:1 :: BSA (mg) :HRP (mg)) and free BSA (orange, 36  $\mu$ M, 0.6 mg/mL). Higher concentration of BSA dominates the CD of HRP which hence cannot be realized in Far-UV CD spectra.

**Table S3:** Specific activities of bound enzyme for one step and two step processes.

| Sample                  | Parameters (Step, stirring time) | Specific activity (1μmol of substrate/min mg protein) |
|-------------------------|----------------------------------|-------------------------------------------------------|
| HRP-BSA-ZrP             | Two step, 4 h                    | $2.9 \pm 0.1$                                         |
| HRP-BSA-ZrP             | Two step, 24 h                   | $4.9 \pm 0.3$                                         |
| HRP-BSA-ZrP             | One step, 24 h                   | $3.8 \pm 0.07$                                        |
| Free HRP                | -                                | $6.3 \pm 0.08$                                        |
| <u>HRP-BSA-TETA-ZrP</u> | One step, 24 h                   | $1.83 \pm 1.2$                                        |
| Mb-BSA-ZrP              | Two step, 4 h                    | $0.05 \pm 0.004$                                      |
| Mb-BSA-ZrP              | Two step, 24 h                   | $0.060 \pm 0.005$                                     |
| Mb-BSA-ZrP              | One step, 24 h                   | $0.090 \pm 0.003$                                     |
| Free Mb                 | -                                | $0.1 \pm 0.02$                                        |
| <u>Mb-BSA-TETA-ZrP</u>  | One step, 24 h                   | $0.80 \pm 0.05$                                       |
| Hb-BSA-ZrP              | Two step, 4 h                    | $0.021 \pm 0.005$                                     |
| Hb-BSA-ZrP              | Two step, 24 h                   | $0.055 \pm 0.002$                                     |
| Hb-BSA-ZrP              | One step, 24 h                   | $0.056 \pm .001$                                      |
| Free Hb                 | -                                | $0.10 \pm 0.03$                                       |
| <u>Hb-BSA-TETA-ZrP</u>  | One step, 24 h                   | $0.035 \pm 0.003$                                     |

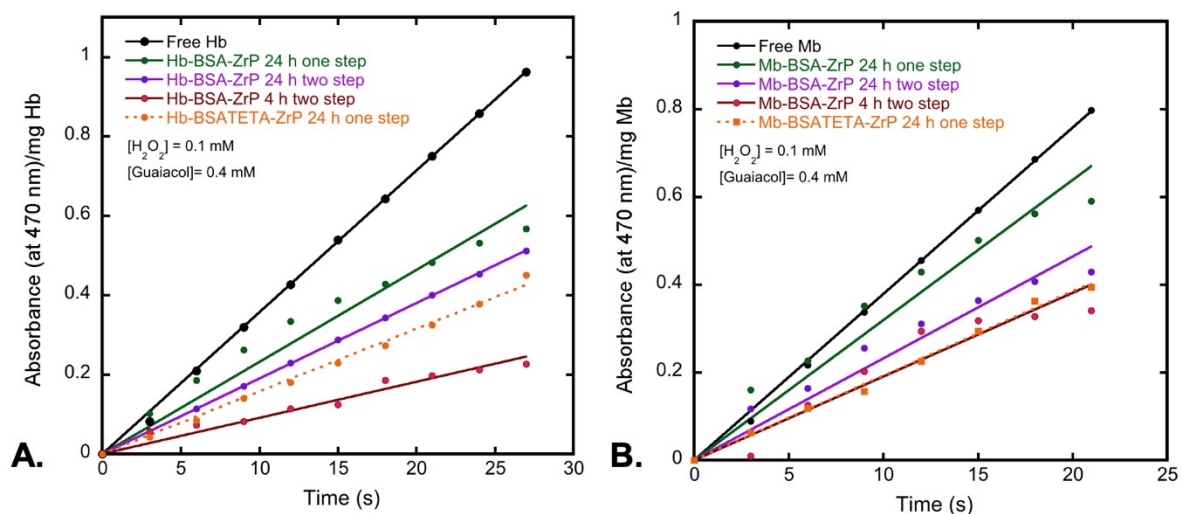

**Figure S16:** Enzyme kinetics of the bound enzymes. Initial rate of peroxidase-like activity of A. Hb B. Mb (10 mM sodium phosphate buffer at pH 7) by monitoring sample absorbance at 470 nm at room temperature.

**Table S4: Dimensional comparison for bench top stirrer (small volume) versus shear reactor (large volume).**

| <b>Parameters</b>                                        | <b>Bench top stirrer</b> | <b>Shear Reactor (IKA)</b> | <b>units</b>                |
|----------------------------------------------------------|--------------------------|----------------------------|-----------------------------|
| <b>Diameter of beaker</b>                                | <b>1.5</b>               | <b>2.4</b>                 | <b>cm</b>                   |
| <b>Radius of beaker (r)</b>                              | <b>0.75</b>              | <b>1.2</b>                 | <b>cm</b>                   |
| <b>Height of Solution (h)</b>                            | <b>0.6</b>               | <b>4.5</b>                 | <b>cm</b>                   |
| <b>Stir bar/shaft length</b>                             | <b>1.3</b>               | <b>8.7</b>                 | <b>cm</b>                   |
| <b>stir bar/shaft height</b>                             | <b>0.2</b>               | <b>27.1</b>                | <b>cm</b>                   |
| <b>stir bar/shaft width</b>                              | <b>0.2</b>               | <b>10.6</b>                | <b>cm</b>                   |
| <b>Ratio of Beaker Diameter: Stir bar length</b>         | <b>1.154</b>             | <b>0.276</b>               | <b>cm:cm</b>                |
| <b>Ratio of Height of solution to height of stir bar</b> | <b>3</b>                 | <b>0.166</b>               | <b>cm:cm</b>                |
| <b>Volume expected (<math>\pi r^2 h</math>)</b>          | <b>1.060</b>             | <b>20.347</b>              | <b>cm<sup>3</sup> or mL</b> |
| <b>Volume of exfoliated sample made</b>                  | <b>0.7</b>               | <b>17</b>                  | <b>mL</b>                   |
| <b>Concentration achieved</b>                            | <b>10</b>                | <b>10</b>                  | <b>mg/mL</b>                |
| <b>Exfoliation Efficiency</b>                            | <b>7</b>                 | <b>170</b>                 | <b>mg</b>                   |
| <b>Shear rate</b>                                        | <b>1000</b>              | <b>10000</b>               | <b>rpm</b>                  |
| <b>Shear time</b>                                        | <b>24</b>                | <b>0.33</b>                | <b>h</b>                    |
| <b>Temperature</b>                                       | <b>25</b>                | <b>25</b>                  | <b>°C</b>                   |

Order of rate results:

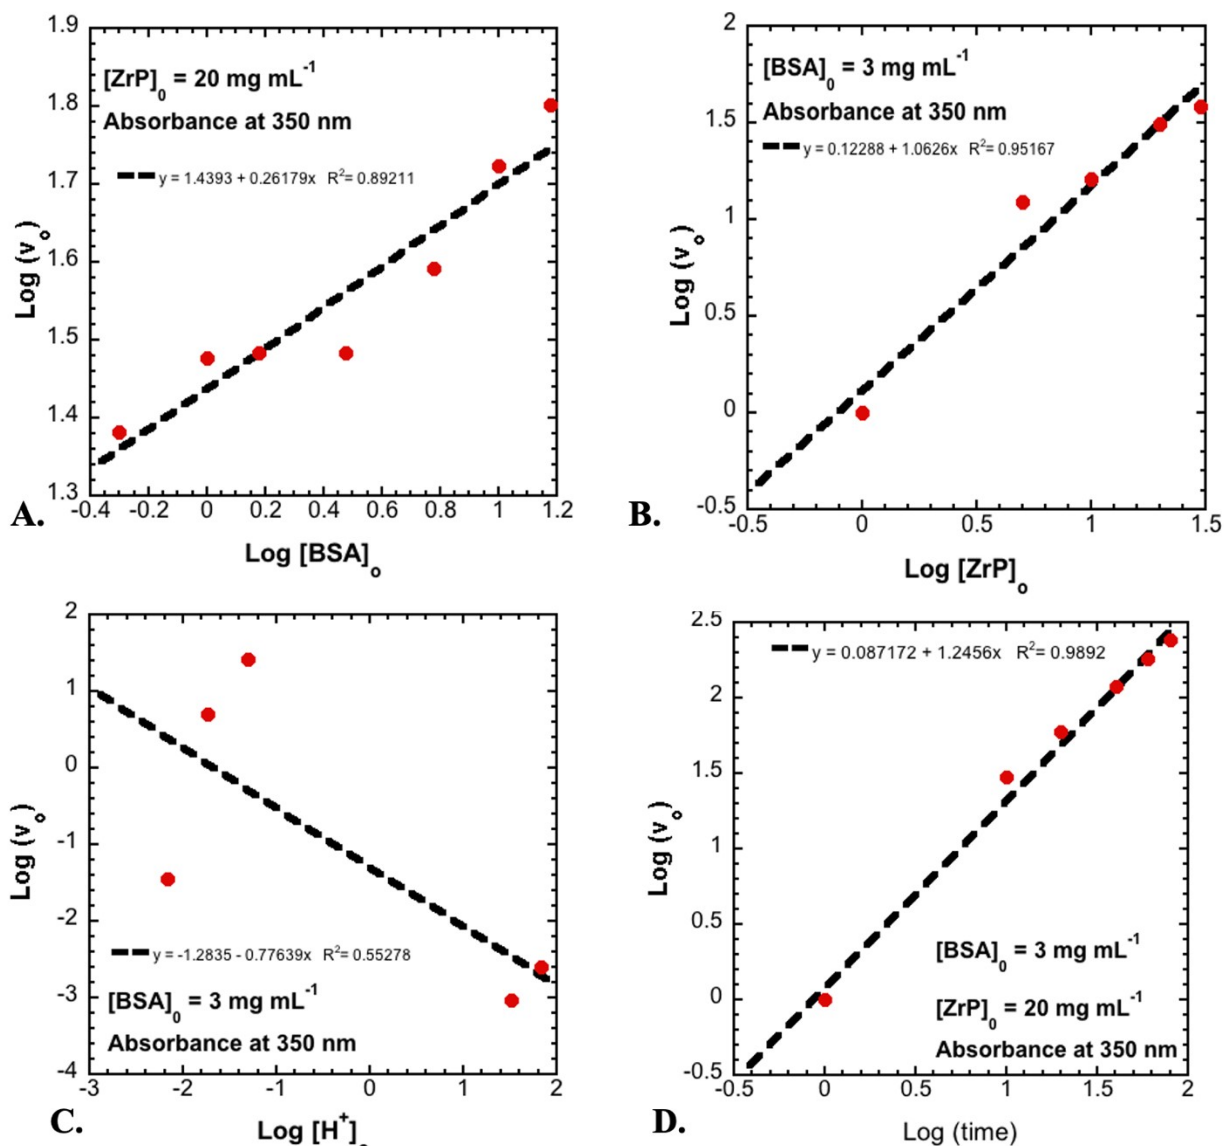

**Figure S17:** Log-log plots to determine the order of the reaction with respect to initial concentration of BSA ( $[\text{BSA}]_0$ ) (A), initial concentration of  $\alpha$ -ZrP ( $[\text{ZrP}]_0$ ) (B),  $\text{H}^+$  concentration (C), and time (D).

Correlation of different physical and chemical properties of proteins with percent peak intensity of exfoliated  $\alpha$ -ZrP.

**Table S5:** Values for various properties of proteins (Part 1)

| Protein                | Charge at pH 7 (electrons) | diameter (nm) | total SASA/energy ( $\text{\AA}^2/\text{Kcal/mol}$ )* | Polar SASA/energy ( $\text{\AA}^2/\text{Kcal/mol}$ )* | Apolar SASA/energy ( $\text{\AA}^2/\text{Kcal/mol}$ ) | molecular weight (kDa) |
|------------------------|----------------------------|---------------|-------------------------------------------------------|-------------------------------------------------------|-------------------------------------------------------|------------------------|
| BSA                    | -27                        | 7.3           | 28683.69                                              | 20713.09                                              | 37794.19                                              | 66.4                   |
| hemoglobin             | -6                         | 6.9           | 24548.47                                              | 7558.11                                               | 16990.35                                              | 64.5                   |
| $\beta$ -lactoglobulin | -18                        | 5.5           | 14708.87                                              | 5894.97                                               | 8814.3                                                | 18.3                   |
| ovalbumin              | -38                        | 5.4           | 54224.67                                              | 19987.47                                              | 34237.19                                              | 42.7                   |
| glucose oxidase        | -30                        | 8.6           | 20479.66                                              | 8833.76                                               | 11645.9                                               | 160                    |
| lysozyme               | 8                          | 1.8           | 8686.49                                               | 2659.13                                               | 3636.7                                                | 14.7                   |

\* the values were calculated using Getarea software, available for free online.<sup>1</sup>

**Table S6:** Values for various properties of proteins (Part 2)

| Proteins               | Pdb id             | Hydrophobic Residues (nonpolar) | Hydrophilic Residues (polar) | # of Arginine on each chain | # of Lysine on each chain | # of residues /protein | Viscosity (cPa)   |
|------------------------|--------------------|---------------------------------|------------------------------|-----------------------------|---------------------------|------------------------|-------------------|
| BSA                    | 4f5s <sup>2</sup>  | 232                             | 351                          | 23                          | 59                        | 583                    | 40 <sup>3</sup>   |
| Hemoglobin             | 1a3n <sup>4</sup>  | 308                             | 266                          | 12                          | 44                        | 574                    | 5.8 <sup>5</sup>  |
| $\beta$ -lactoglobulin | 1beb <sup>6</sup>  | 144                             | 176                          | 3                           | 15                        | 320                    | 2.14 <sup>7</sup> |
| Ovalbumin              | 1ova <sup>8</sup>  | 755                             | 809                          | 15                          | 20                        | 1564                   | 25 <sup>9</sup>   |
| Glucose oxidase        | 1cf3 <sup>10</sup> | 287                             | 296                          | 22                          | 15                        | 583                    | 24 <sup>11</sup>  |
| Lysozyme               | 1dpx <sup>12</sup> | 75                              | 89                           | 11                          | 6                         | 164                    | 15 <sup>13</sup>  |

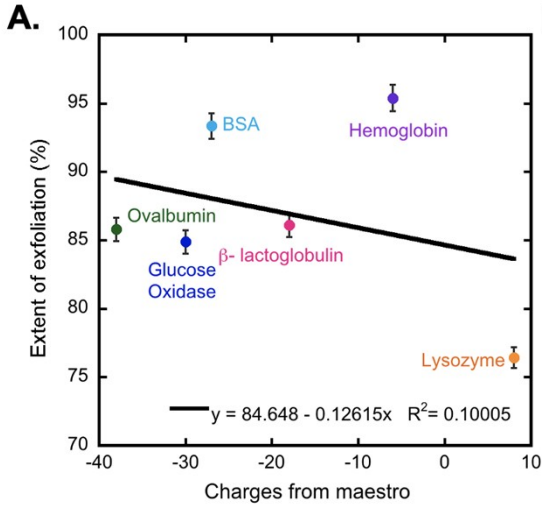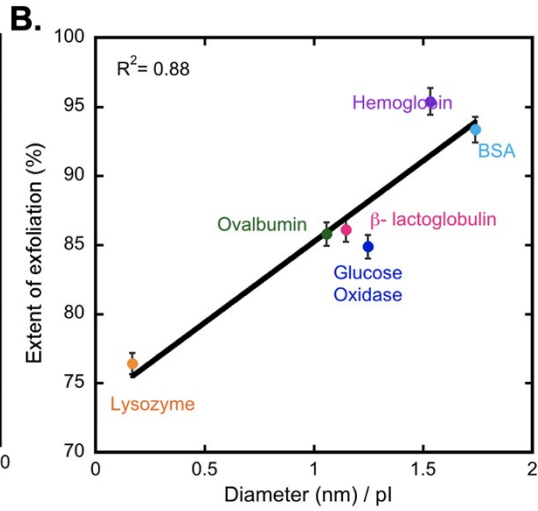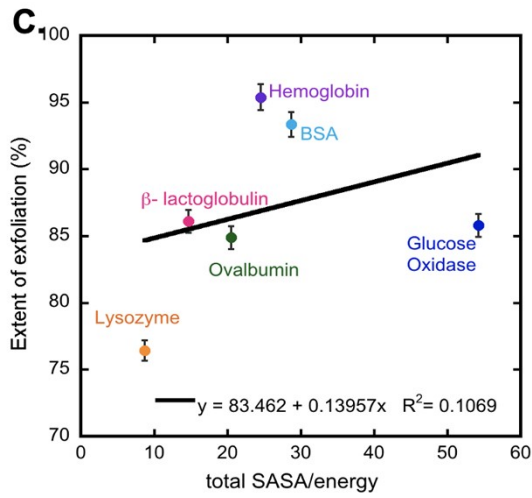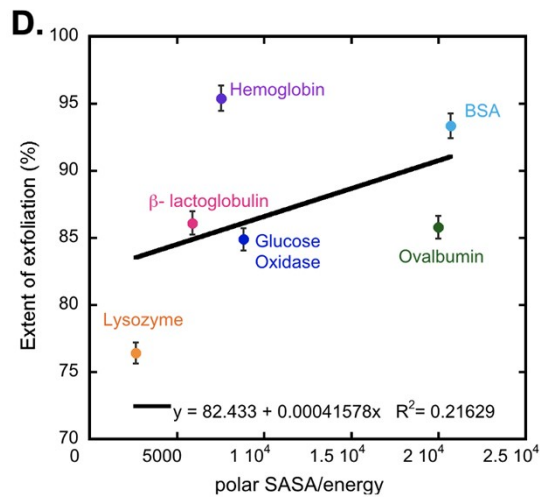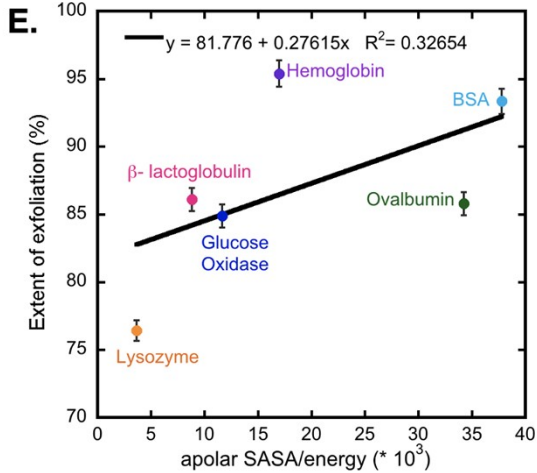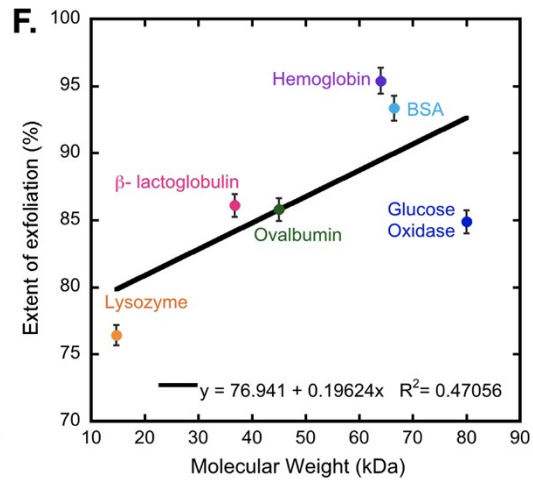



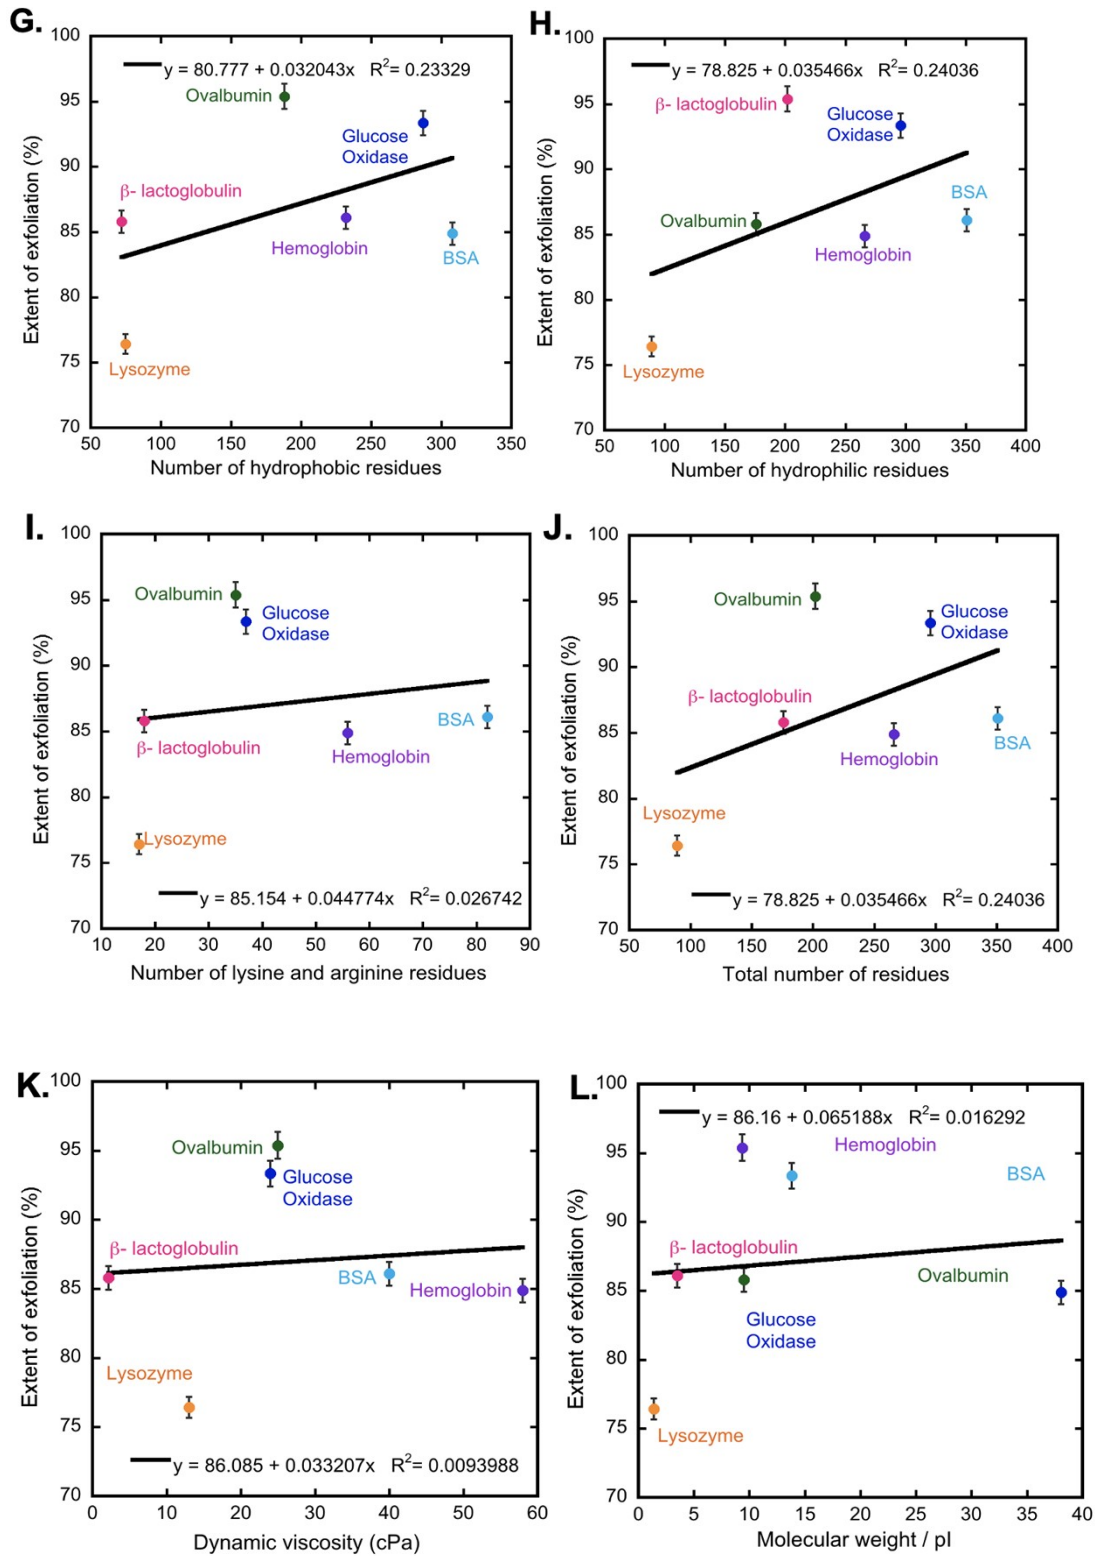

**Figure S18:** Percent peak intensity at 7.6 Å plotted against **A.** charge at pH 5 of the protein as calculated by maestro, Schrödinger suites **B.** Diameter (nm)/pI of the protein **C.** Total

SASA/energy of the protein **D**. Polar SASA/energy of the protein **E**. Apolar SASA/energy of the protein as calculated by GetArea software\* **F**. molecular weight of the protein **G**. Number of hydrophobic residues in the protein **H**. Number of hydrophilic residues in the protein **I**. Number of lysine and arginine residues in the protein **J**. Total number of residues in the protein in the protein **K**. Dynamic viscosity (cPa) of the protein **L**. molecular weight/ pI of the protein .

\* (<http://curie.utmb.edu/getarea.html>)

## References:

---

1 Fraczekiewicz, R., Braun, W. Exact and Efficient Analytical Calculation of the Accessible Surface Areas and Their Gradients for Macromolecules. *J. Comp. Chem.*, **1998**, *19*, 319-333.

2 Bujacz, A., Structures of bovine, equine and leporine serum albumin. *Acta crystallographica. Section D, Biological crystallography* **2012**, *68* (Pt 10), 1278-89.

3 Lin, J.-L.; Chu, M.-L.; Chen, C.-H., A portable multiple ionization source biological mass spectrometer. *Analyst* **2020**.

4 Tame, J. R.; Vallone, B., The structures of deoxy human haemoglobin and the mutant Hb Tyr $\alpha$ 42His at 120 K. *Acta crystallographica. Section D, Biological crystallography* **2000**, *56* (Pt 7), 805-11.

5 Heidema, A. G.; Nagelkerke, N., Developing a Discrimination Rule between Breast Cancer Patients and Controls Using Proteomics Mass Spectrometric Data: A Three-Step Approach. **2008**, *7* (2).

6 Brownlow, S.; Morais Cabral, J. H.; Cooper, R.; Flower, D. R.; Yewdall, S. J.; Polikarpov, I.; North, A. C.; Sawyer, L., Bovine beta-lactoglobulin at 1.8 Å resolution--still an enigmatic lipocalin. *Structure (London, England : 1993)* **1997**, *5* (4), 481-95.

7 Richert, Manuela E.; Gochev, Georgi G.; Braunschweig, Björn, Specific Ion Effects of Trivalent Cations on the Structure and Charging State of  $\beta$ -Lactoglobulin Adsorption Layers. *Langmuir*. Aug **2019**. *35*, 11299-11307

8 Stein, P. E.; Leslie, A. G.; Finch, J. T.; Carrell, R. W., Crystal structure of uncleaved ovalbumin at 1.95 Å resolution. *Journal of molecular biology* **1991**, *221* (3), 941-59.

9 Watanabe, E.; Tsoka, S.; Asenjo, J.A., Selection of Chromatographic Protein Purification Operations Based on Physicochemical Properties. *Annals of the New York Academy of Sciences*. June **1994**. *721*(1), 348-364.

10 Wohlfahrt, G.; Witt, S.; Hendle, J.; Schomburg, D.; Kalisz, H. M.; Hecht, H. J., 1.8 and 1.9 Å resolution structures of the *Penicillium amagasakiense* and *Aspergillus niger* glucose oxidases as a basis for modelling substrate complexes. *Acta crystallographica. Section D, Biological crystallography* **1999**, *55* (Pt 5), 969-77.

---

11 Zhao, K.; Gu, W.; Zheng, S.; Zhang, C.; Xian, Y., SDS–MoS<sub>2</sub> nanoparticles as highly-efficient peroxidase mimetics for colorimetric detection of H<sub>2</sub>O<sub>2</sub> and glucose. *Talanta* **2015**, *141*, 47-52.

12 Weiss, M. S.; Palm, G. J.; Hilgenfeld, R., Crystallization, structure solution and refinement of hen egg-white lysozyme at pH 8.0 in the presence of MPD. *Acta crystallographica. Section D, Biological crystallography* **2000**, *56* (Pt 8), 952-8.

13 Ladam, G.; Schaaf, P.; Decher, G.; Voegel, J; Cuisinier, F.J., Protein adsorption onto auto-assembled polyelectrolyte films. *Biomolecular Engineering*. Aug **2002**. *19*(2-6), 273-280.
